# Supplementary material
Source: PubMed Central journal article supplement (PMC3880198)
Supplement: NIHMS367696-supplement-supplement_1.pdf [file NIHMS367696-supplement-supplement_1.pdf]

## FIGURE LEGENDS

**Fig 1.** Clinical and radiologic studies of a tumor response to cilengitide. All metastatic lesions decreased in size. It is noteworthy to observe initial disease enlargement before disease regression both in the cutaneous and pulmonary lesions. (A) Regression of in-transit cutaneous metastases on left lower extremity. (B) Computed tomography scan showing response of the lung lesions (arrow).

## SUPPLEMENTARY TABLES AND LEGENDS

**Table** pEKT1/2, pAKT and pFAK Expression and Clinical Response

**Figure** CONSORT Diagram

**Supplemental 1. pERK1/2, pAKT and pFAK Expression and Clinical Response**

| patient | pERK1/2<br>pre | pERK1/2<br>post | pERK1/2<br>$\Delta$ | pAKT<br>pre | pAKT<br>post | pAKT<br>$\Delta$ | p-FAK<br>pre | p-FAK<br>post | p-FAK<br>$\Delta$ | Best<br>response |
|---------|----------------|-----------------|---------------------|-------------|--------------|------------------|--------------|---------------|-------------------|------------------|
| 3       | 2              | 0               | ↓                   | 3           | 3            | ↔                | 3            | 2             | ↓                 | SD               |
| 5       | 0              | 1               | ↑                   | 1           | --           |                  | 0            | 1             | ↑                 | PD               |
| 7       | --             | 0               |                     | 0           | 1            | ↑                | --           | 0             |                   | PD               |
| 9       | 1              | 0               | ↓                   | 2           | 2            | ↔                | 3            | 1             | ↓                 | PD               |
| 13      | 2              | 0               | ↓                   | 2           | 1            | ↓                | 2            | 1             | ↓                 | PD               |
| 14      | 0              | 0               | ↔                   | 0           | 2            | ↑                | 0            | 0             | ↔                 | PR               |
| 15      | 0              | 0               | ↔                   | 0           | 0            | ↔                | 0            | 1             | ↑                 | PD               |
| 16      | 0              | 0               | ↔                   | 2           | 0            | ↓                | 1            | 0             | ↓                 | PD               |
| 17      | 2              | 0               | ↓                   | 1           | 0            | ↓                | 2            | 0             | ↓                 | NE               |
| 18      | --             | --              |                     | 1           | 1            | ↔                | --           | --            |                   | PD               |
| 19      | 0              | 1               | ↑                   | 0           | 2            | ↑                | 1            | 0             | ↓                 | PD               |
| 20      | --             | --              |                     | 1           | 2            | ↑                | --           | --            |                   | PD               |
| 22      | --             | --              |                     | 2           | 0            | ↓                | --           | --            |                   | PD               |

Abbreviations: SD, stable disease; PD, progressive disease; PR, partial response; NE, not evaluable

$\Delta$  denotes a change in expression after treatment

The numbers indicate percentage of cells staining positively (0 = 0 to 5%; 1 = 6–25%; 2 = 26–75%; 3 = >75%)
